# Supplementary material
Source: Springer Nature journal article supplement (https://www.springermedizin.de/resource/supplementary/40169_2012_13_MOESM2_ESM.pdf/9675430)

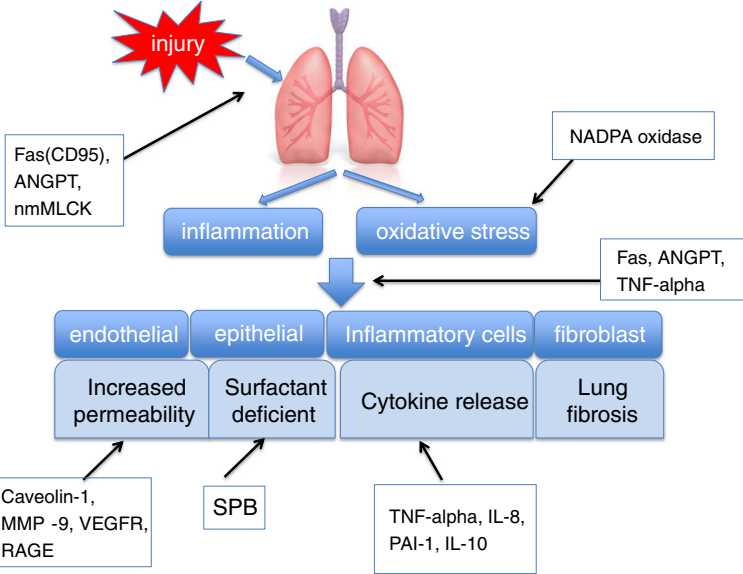

Supplement: MOESM2 [file 9675430]
